# Supplementary material for: Calibration event selection for green urban drainage modelling
Source: Copernicus journal article supplement (doi:10.5194/hess-2019-67), 2019-03-08
Supplement: Supplementary file [file hess-2019-67-AC2-supplement.pdf]

Table C1: characteristics of all rainfall events used in one or more calibration scenarios.

| Event #                                                                                                                                                                                                                                                                                                                                                                                                                                                                                                                                | Precipitation sum in preceding 72 hr | Precipitation sum (P_sum) | Precipitation duration (D_prec) | Average precipitation intensity (PI_mean) | Highest 30-minute average precipitation intensity (PI_30m) | Runoff volume (QV) | Percentage runoff (QV_ppP) | Peak flow rate (Q_max) | Highest 60-minute average flow rate (Q_60m) | Runoff from green areas [b] | Of which originating from impervious areas [c] | Originating from green areas [d] | Average percentage runoff from green areas [e] |
|----------------------------------------------------------------------------------------------------------------------------------------------------------------------------------------------------------------------------------------------------------------------------------------------------------------------------------------------------------------------------------------------------------------------------------------------------------------------------------------------------------------------------------------|--------------------------------------|---------------------------|---------------------------------|-------------------------------------------|------------------------------------------------------------|--------------------|----------------------------|------------------------|---------------------------------------------|-----------------------------|------------------------------------------------|----------------------------------|------------------------------------------------|
|                                                                                                                                                                                                                                                                                                                                                                                                                                                                                                                                        | mm                                   | mm                        | hr                              | mm/hr                                     | mm/hr                                                      | mm                 | %                          | L/s                    | L/s                                         | mm                          | mm                                             | mm                               | %                                              |
| 199                                                                                                                                                                                                                                                                                                                                                                                                                                                                                                                                    | 2.4                                  | 13.8                      | 41.6                            | 0.3                                       | 4.0                                                        | 1.7                | 12.4                       | 4.2                    | 3.3                                         | 0.06                        | 0.02                                           | 0.04                             | 0.3                                            |
| 209                                                                                                                                                                                                                                                                                                                                                                                                                                                                                                                                    | 0.2                                  | 8.0                       | 9.5                             | 0.8                                       | 2.8                                                        | 0.5                | 6.9                        | 4.5                    | 2.7                                         |                             |                                                |                                  |                                                |
| 211                                                                                                                                                                                                                                                                                                                                                                                                                                                                                                                                    | 8.3                                  | 9.7                       | 22.8                            | 0.4                                       | 6.9                                                        | 1.1                | 11.1                       | 29.2                   | 11.1                                        |                             |                                                |                                  |                                                |
| 214                                                                                                                                                                                                                                                                                                                                                                                                                                                                                                                                    | 7.3                                  | 6.4                       | 12.1                            | 0.5                                       | 4.3                                                        | 0.6                | 10.1                       | 40.5                   | 8.5                                         |                             |                                                |                                  |                                                |
| 222                                                                                                                                                                                                                                                                                                                                                                                                                                                                                                                                    | 1.1                                  | 9.8                       | 12.8                            | 0.8                                       | 7.5                                                        | 0.7                | 7.2                        | 26.4                   | 13.3                                        |                             |                                                |                                  |                                                |
| 270                                                                                                                                                                                                                                                                                                                                                                                                                                                                                                                                    | 0.0                                  | 9.3                       | 38.5                            | 0.2                                       | 3.5                                                        | 1.1                | 11.3                       | 22.9                   | 8.7                                         |                             |                                                |                                  |                                                |
| 306                                                                                                                                                                                                                                                                                                                                                                                                                                                                                                                                    | 10.1                                 | 8.6                       | 9.1                             | 0.9                                       | 7.1                                                        | 0.7                | 8.5                        | 27.5                   | 9.3                                         |                             |                                                |                                  |                                                |
| 307                                                                                                                                                                                                                                                                                                                                                                                                                                                                                                                                    | 18.3                                 | 29.9                      | 37.7                            | 0.8                                       | 8.5                                                        | 4.9                | 16.2                       | 71.2                   | 42.9                                        | 1.27                        | 0.36                                           | 0.91                             | 3.0                                            |
| 310                                                                                                                                                                                                                                                                                                                                                                                                                                                                                                                                    | 12.7                                 | 8.6                       | 10.0                            | 0.9                                       | 7.5                                                        | 1.2                | 14.0                       | 37.4                   | 17.4                                        | 0.17                        | 0.05                                           | 0.12                             | 1.4                                            |
| 530                                                                                                                                                                                                                                                                                                                                                                                                                                                                                                                                    | 13.8                                 | 6.7                       | 2.8                             | 2.4                                       | 7.2                                                        | 0.8                | 11.2                       | 58.9                   | 13.5                                        |                             |                                                |                                  |                                                |
| 939                                                                                                                                                                                                                                                                                                                                                                                                                                                                                                                                    | 0.6                                  | 7.0                       | 25.6                            | 0.3                                       | 1.0                                                        | 0.4                | 5.7                        | 2.1                    | 1.8                                         |                             |                                                |                                  |                                                |
| 962                                                                                                                                                                                                                                                                                                                                                                                                                                                                                                                                    | 0.0                                  | 8.5                       | 11.2                            | 0.8                                       | 1.4                                                        | 2.1                | 24.9                       | 4.9                    | 4.4                                         | 1.09                        | 0.31                                           | 0.78                             | 9.2                                            |
| 971                                                                                                                                                                                                                                                                                                                                                                                                                                                                                                                                    | 0.2                                  | 2.6                       | 18.6                            | 0.1                                       | 1.1                                                        | 0.3                | 11.3                       | 4.0                    | 2.9                                         |                             |                                                |                                  |                                                |
| 978                                                                                                                                                                                                                                                                                                                                                                                                                                                                                                                                    | 12.7                                 | 25.0                      | 65.8                            | 0.4                                       | 5.8                                                        | 4.8                | 19.1                       | 64.5                   | 16.6                                        | 1.77                        | 0.50                                           | 1.27                             | 5.1                                            |
| 982                                                                                                                                                                                                                                                                                                                                                                                                                                                                                                                                    | 0.0                                  | 5.6                       | 3.4                             | 1.7                                       | 7.0                                                        | 0.9                | 15.8                       | 49.5                   | 17.2                                        | 0.21                        | 0.06                                           | 0.15                             | 2.7                                            |
| 984                                                                                                                                                                                                                                                                                                                                                                                                                                                                                                                                    | 13.1                                 | 2.4                       | 6.3                             | 0.4                                       | 4.6                                                        | 1.4                | 59.1                       | 71.7                   | 14.0                                        | 1.12                        | 0.32                                           | 0.80                             | 33.7                                           |
| 995                                                                                                                                                                                                                                                                                                                                                                                                                                                                                                                                    | 4.8                                  | 2.1                       | 8.5                             | 0.2                                       | 1.8                                                        | 0.6                | 28.6                       | 32.0                   | 9.7                                         | 0.35                        | 0.10                                           | 0.25                             | 11.9                                           |
| 997                                                                                                                                                                                                                                                                                                                                                                                                                                                                                                                                    | 2.2                                  | 24.6                      | 49.0                            | 0.5                                       | 2.4                                                        | 5.1                | 20.7                       | 15.0                   | 6.9                                         | 2.14                        | 0.61                                           | 1.53                             | 6.2                                            |
| 1001                                                                                                                                                                                                                                                                                                                                                                                                                                                                                                                                   | 0.0                                  | 35.3                      | 56.6                            | 0.6                                       | 8.6                                                        | 8.8                | 25.0                       | 56.5                   | 32.5                                        | 4.58                        | 1.30                                           | 3.28                             | 9.3                                            |
| 1004                                                                                                                                                                                                                                                                                                                                                                                                                                                                                                                                   | 22.5                                 | 4.2                       | 13.9                            | 0.3                                       | 5.9                                                        | 1.1                | 25.2                       | 33.3                   | 10.6                                        | 0.56                        | 0.16                                           | 0.40                             | 9.5                                            |
| 1019                                                                                                                                                                                                                                                                                                                                                                                                                                                                                                                                   | 0.5                                  | 22.3                      | 49.7                            | 0.4                                       | 2.3                                                        | 4.7                | 21.2                       | 12.9                   | 9.3                                         | 2.06                        | 0.58                                           | 1.47                             | 6.6                                            |
| 1028                                                                                                                                                                                                                                                                                                                                                                                                                                                                                                                                   | 6.2                                  | 2.8                       | 7.0                             | 0.4                                       | 1.3                                                        | 1.2                | 43.5                       | 6.3                    | 4.2                                         | 0.89                        | 0.25                                           | 0.64                             | 22.5                                           |
|                                                                                                                                                                                                                                                                                                                                                                                                                                                                                                                                        |                                      |                           |                                 |                                           |                                                            |                    |                            |                        |                                             |                             |                                                |                                  |                                                |
| <p>a Calculated assuming 100% runoff from impervious areas: <math>a = QV - 0.12 P\_sum</math>, where 0.12 is the percentage of directly connected impervious area. (Some of this runoff originated from impervious areas that drained to green areas).</p> <p>b Calculated as <math>b = a (25 / (25+63))</math>, where 25 and 63 are the percentages of indirectly connected impervious surfaces and green surfaces respectively.</p> <p>c Calculated as <math>c = a - b</math></p> <p>d Calculated as <math>d = c / P\_sum</math></p> |                                      |                           |                                 |                                           |                                                            |                    |                            |                        |                                             |                             |                                                |                                  |                                                |

Table C2: calibrated rainfall multipliers and new percentages runoff.

| Event # | N_T6 | T32S_D_prec | T32S_P_sum  | T32S_PI_mean | T32S_Q_60m | T32S_Q_max | T32S_QV_ppP | T6_D_prec | T6_P_sum | T6_PI_30m | T6_PI_mean | T6_Q_60m | T6_Q_max | T6_QV_ppP | Mean | New P | New QV_ppP  | Swap stage   |
|---------|------|-------------|-------------|--------------|------------|------------|-------------|-----------|----------|-----------|------------|----------|----------|-----------|------|-------|-------------|--------------|
| 199     |      |             |             |              |            |            |             | 0.58      | 0.58     |           |            |          |          |           | 0.58 | 8.0   | <b>21.4</b> |              |
| 209     |      |             |             | 0.48         |            |            |             |           |          |           | 0.48       |          |          |           | 0.48 | 3.8   | 14.3        | gray > green |
| 211     |      | 0.70        | 0.70        |              | 0.70       | 0.70       |             |           |          |           |            |          |          |           | 0.70 | 6.8   | <b>15.8</b> | gray > green |
| 214     |      |             |             |              |            | 1.16       |             |           |          |           |            |          |          |           | 1.16 | 7.4   | 8.7         |              |
| 222     |      |             | 0.68        |              | 0.68       |            |             |           |          | 0.68      |            |          |          |           | 0.68 | 6.7   | <u>10.6</u> |              |
| 270     |      | 1.24        | 1.22        |              |            |            | 1.28        | 1.26      |          |           |            |          |          |           | 1.25 | 11.7  | 9.1         |              |
| 306     |      |             |             | 0.74         |            |            |             |           |          | 0.70      | 0.74       |          |          |           | 0.73 | 6.3   | <u>11.7</u> |              |
| 307     | 1.48 |             | <b>1.46</b> | 1.48         | 1.48       | 1.48       |             |           | 1.48     | 1.44      | 1.44       | 1.52     | 1.48     |           | 1.47 | 44.0  | <u>11.0</u> | green > gray |
| 310     |      |             |             | 1.06         | 1.06       |            |             |           |          | 1.06      | 1.06       | 1.14     |          |           | 1.08 | 9.2   | 13.0        |              |
| 530     | 1.14 |             |             | 1.10         | 1.10       | 1.12       | 1.04        |           |          | 1.08      | 1.08       |          | 1.14     |           | 1.10 | 7.4   | 10.2        |              |
| 939     |      | 0.60        |             |              |            |            |             |           |          |           |            |          |          |           | 0.60 | 4.2   | 9.5         |              |
| 962     |      |             |             |              |            |            |             |           |          |           |            |          |          | 0.98      | 0.98 | 8.3   | <b>25.4</b> |              |
| 971     |      |             |             |              |            |            | 1.08        |           |          |           |            |          |          |           | 1.08 | 2.8   | 10.4        |              |
| 978     | 1.38 | 1.38        | <b>1.34</b> |              |            | 1.34       |             | 1.40      | 1.42     |           |            | 1.36     | 1.38     |           | 1.38 | 34.4  | 13.9        |              |
| 982     | 1.22 |             |             | 1.20         |            |            |             |           |          |           | 1.26       | 1.22     | 1.26     |           | 1.23 | 6.9   | 12.8        |              |
| 984     |      |             |             |              |            | 2.02       | 1.94        |           |          |           |            | 2.12     | 2.00     | 1.90      | 2.00 | 4.8   | <b>29.6</b> |              |
| 995     |      |             |             |              |            |            | 2.92        |           |          |           |            |          |          | 2.88      | 2.90 | 6.1   | 9.9         | green > gray |
| 997     |      |             |             |              |            |            |             | 1.24      | 1.26     |           |            |          |          |           | 1.25 | 30.8  | 16.6        |              |
| 1001    | 1.70 | 1.66        | <b>1.60</b> |              | 1.64       |            |             | 1.66      | 1.66     | 1.60      |            | 1.64     | 1.70     | 1.64      | 1.65 | 58.2  | 15.1        |              |
| 1004    |      |             |             |              |            |            |             |           |          |           |            |          |          | 0.78      | 0.78 | 3.3   | <b>32.3</b> |              |
| 1019    | 1.46 | 1.48        |             |              |            |            |             | 1.46      | 1.44     |           |            |          |          |           | 1.46 | 32.6  | 14.5        |              |
| 1028    |      |             |             |              |            |            | 1.30        |           |          |           |            |          |          | 1.30      | 1.30 | 3.7   | <b>33.4</b> |              |

**Table C3:** Calibration and validation performance of single and two-stage calibration scenarios. HR denotes the high-resolution model, LR the low resolution model. The names of the calibration scenarios are explained in paper III.

| Calibration scenario | Calibration (6 events) |      | Validation (19 events) |    |                       |      |              |       |                 |      |
|----------------------|------------------------|------|------------------------|----|-----------------------|------|--------------|-------|-----------------|------|
|                      | NSE                    |      | # events NSE > 0.5     |    | Mean NSE <sup>a</sup> |      | Volume error |       | Peak flow ratio |      |
|                      | HR                     | LR   | HR                     | LR | HR                    | LR   | HR           | LR    | HR              | LR   |
| N_T6                 | 0.80                   | 0.84 | 12                     | 7  | 0.45                  | 0.21 | -0.24        | -0.43 | 0.91            | 0.50 |
| T6_D_prec            | 0.74                   | 0.81 | 11                     | 6  | 0.43                  | 0.34 | -0.25        | -0.44 | 0.91            | 0.51 |
| T6_P_sum             | 0.75                   | 0.75 | 11                     | 8  | 0.45                  | 0.22 | -0.23        | -0.38 | 0.91            | 0.60 |
| T6_PI_30m            | 0.74                   | 0.74 | 9                      | 9  | 0.29                  | 0.43 | -0.24        | -0.34 | 0.98            | 0.74 |
| T6_PI_mean           | 0.77                   | 0.77 | 10                     | 6  | 0.33                  | 0.38 | -0.24        | -0.43 | 0.96            | 0.59 |
| T6_Q_60m             | 0.79                   | 0.81 | 8                      | 6  | 0.37                  | 0.29 | -0.29        | -0.46 | 0.81            | 0.49 |
| T6_Q_max             | 0.85                   | 0.86 | 12                     | 10 | 0.44                  | 0.49 | -0.24        | -0.36 | 0.92            | 0.64 |
| T6_QV_ppP            | 0.68                   | 0.65 | 12                     | 10 | 0.47                  | 0.37 | -0.24        | -0.40 | 0.90            | 0.66 |
|                      |                        |      |                        |    |                       |      |              |       |                 |      |
| T32S_D_prec          | 0.76                   | 0.84 | 12                     | 10 | 0.34                  | 0.38 | -0.02        | -0.05 | 1.00            | 0.86 |
| T32S_P_sum           | 0.83                   | 0.68 | 10                     | 13 | 0.34                  | 0.51 | -0.15        | -0.27 | 0.99            | 0.60 |
| T32S_PI_mean         | 0.83                   | 0.78 | 13                     | 13 | 0.44                  | 0.46 | -0.16        | -0.22 | 1.00            | 0.80 |
| T32S_Q_60m           | 0.79                   | 0.73 | 10                     | 10 | 0.33                  | 0.28 | -0.13        | -0.04 | 0.99            | 1.02 |
| T32S_Q_max           | 0.82                   | 0.80 | 11                     | 12 | 0.34                  | 0.33 | -0.13        | -0.07 | 0.96            | 1.03 |
| T32S_QV_ppP          | 0.70                   | 0.67 | 11                     | 12 | 0.46                  | 0.46 | -0.26        | -0.18 | 0.87            | 0.79 |

<sup>a</sup> mean NSE was calculated after setting NSE of individual events to -1 if NSE was lower than -1, to avoid large influence from negative NSE values.
